# Supplementary material
Source: PubMed Central journal article supplement (PMC3256847)
Supplement: supp_M111.311571_jbc.M111.311571-1.pdf [file supp_M111.311571_jbc.M111.311571-1.pdf]

### Supplemental Figure Legends:

Supplemental 1. Amino acid sequence alignment of the RgtA, B, C, and D polypeptides. The alignment was performed using the multiple sequence alignment scoring matrix BLOSUM 62 application in the Clone Manager program. Shaded letters represent sequence identity.

Supplemental 2. Relationship of RgtE to ArnC, FlmF1 and FlmF2. The RgtE amino acid sequence shares similar qualities with known bactoprenyl glycosyl transferases that function in the synthesis of monosaccharide lipid donors which are utilized in the biosynthesis of LPS. Like the known glycosyl transferases ArnC, FlmF1, and FlmF2, the RgtE amino acid sequence contains a glycosyl transferase 2 (GT2) domain which contains the signature DXD catalytic motif followed by two signature putative C-terminal transmembrane (TM) domains. The enzymes are likely anchored to the inner membrane by the transmembrane domains leaving the catalytic domain (GT2) exposed to the cytoplasmic/inner membrane interface.

Supplemental 3. Amino acid sequence alignment of the *R. leguminosarum* bv. *viciae* RgtD and putative RgtD proteins in *Caulobacter crescentus* CB15 and *Aquifex aeolicus* VF5. Alignments were made in the Clone Manager program using the BLOSUM 62 matrix scoring system. Shaded letters are identical amino acids. The putative RgtD peptides share over 50% similarity (positives) with the *Rhizobium* RgtD and share highly conserved regions towards the N-terminus.

Summary of Percent Matches:

|                   |      |     |   |         |     |
|-------------------|------|-----|---|---------|-----|
| Ref: RgtA(RL1469) | 1 to | 499 | ( | 499 aa) | --  |
| 2: RgtB(RL1468)   | 1 to | 494 | ( | 494 aa) | 45% |
| 3: RgtC(RL1471)   | 1 to | 501 | ( | 501 aa) | 59% |
| 4: RgtD(RL0684)   | 1 to | 473 | ( | 473 aa) | 21% |

```

RgtA(RL1469)      1 MLERATRTIKTAGLLAAYFVL-NIVLRIVLPHSLELDEAEQSFSSQYLLAGYGPQPPFFY
RgtB(RL1468)      1 MTESNRRDISWIFALLAAYFVL-QVGVRLATSHSLDLDEAEQAERSQWLAAGYGPQPPFFY
RgtC(RL1471)      1 MLERITRSITSASIFLAAYFLL-NIALRIALPHTLDLDEAEQSEYSQYLLAGYGPQPPFFY
RgtD(RL0684)      1 MSPR-----SGLLIVLGFETLWRVVMLNFDATDFFVDEAQYWFWSQNLDLGYYSKPPMI

RgtA(RL1469)      60 NWMQYAVVSVTGIS-----IGALIVPKNILLFLSYLFGYGLAGRRVLKDEALAAVGMILA
RgtB(RL1468)      60 NWLQYTVFQFAGVS-----LTALSIVKNLLLFISYLLYGLTARLVLRDKALVAIATLG
RgtC(RL1471)      60 NWIQYAIVSVTGIS-----MWVLSVPKNIIILFGCYLFGYGLAAREVLKSRSLAALAMLS
RgtD(RL0684)      54 AWVIRAMTELSGSNAIYWIRLLGPLIHMAAALVLMK-----TAKRFVGPETIEGWTG-AT

RgtA(RL1469)      113 LITLPQVSYMAQQDLTHTTALLFASLFLYGFRTLRDPMASYLGLLATGIGLISKYN
RgtB(RL1468)      113 LLTIPQMAFEMQRDLTHTVAVFFSASIFFYGFIRSLKQPSLASYLIAGIGIGFGLLAKYN
RgtC(RL1471)      113 LITLPQVGLMAQRELTHTVALLFATSLFLFGFRTLRQPTIGSYLLIGIATGIGLISKYN
RgtD(RL0684)      107 YITLPGVA-LSSVFFSTDVILLFFIAIALLAYFGLTQRRSVGLALVMGLGVGLAFLTKYA

RgtA(RL1469)      173 FALMPVVALIAIILPDAEWRRRALDWRMLAAITVALVIVLPHAVWLQGNLAFASDITLVK-
RgtB(RL1468)      173 FAILPAAALIAALSARLRPRIFDWRLGLTAAVALVITLPHLFWLKDNLDFATARTLEK-
RgtC(RL1471)      173 FAILPFAALIAVLPEREWRSLIDWRLLPAAVLAILIVLPHALWLPDNLASASAPTLEK-
RgtD(RL0684)      166 VLFVVPGGAIALLLIPAARIAVRD--VIIAVAVAAVVALPNLWV---NL--QHDNTTVRH

RgtA(RL1469)      232 ---MAAGS---EPAGAVRIGKGLLAFLVAIIAFAALFVVIFA---ATFRRD--FVRALSA
RgtB(RL1468)      232 ---MTASG---DASYLTQVAMGVSSLALAIISFAALTVAFA---IVFGKS--LRPALGS
RgtC(RL1471)      232 ---MTADPGHLAPAGLPRIGQGLLSLVIAVLGFVALPIVLI---AAFRRDSRVFRALSS
RgtD(RL0684)      219 TQDIAHWS---ELGINLRRLGLEFFAAQFGVVG----PIIFFAMLWAVYR----MIRGRSD

RgtA(RL1469)      281 GNRWTGMMERMML-ASLAGIALIVLFTGSTTVRERWLDPFLL---VLPIYFLAKMQAAGL
RgtB(RL1468)      281 GSEWTRLLERMML-VFLAGILLIVFGGAAGIKDRWLVPMFL---ILPLYFCLKIEAAGV
RgtC(RL1471)      286 SSPMIRVIERMMV-ISLLAFVGVVLFAGASDIHERWLDPCLL---VLLIYFLFKLETADI
RgtD(RL0684)      268 DR-----EKMLVWLSMPVLLITLQATVAKAYANWAVTAYVAGTILAVWLLYLKWPKGL

RgtA(RL1469)      337 DLSAGLRRFRPVLPVLMACVLIALGFRVVGAGLIGTY-SRPNVPMAGFAREMTRQAEFAL
RgtB(RL1468)      337 ETGKALRRFIPVVAVIMIGVPAALYGSVAAARFTGHY-ERLNRPYAGMLEILRKQAEFPA
RgtC(RL1471)      342 DLSAGLARFRPVVPMVIVLSILLFRIVGIQYIGTY-TRTNVPFSGYVAELTATRKPVL
RgtD(RL0684)      322 RLSLTINGIASLL-FPLATIFPHQLLLPNGDALMKRYLGRAEVSRE--AAALATQAGTDI

RgtA(RL1469)      396 VIASDTYIGNMRLQFPDVEVVIIDFPAPGIF-AY-----AEAKGPVLIVWRGKKA
RgtB(RL1468)      396 ILAGDSSLAGNLRQDIPGVVILSADY--PGFN-PD-----LTSRRPILLVWLLPK--
RgtC(RL1471)      401 IVAGTKFIAGNMRLQFPDVEVVIIDFPAPGIF-AY-----AEAKGPVLIVWRGKKA
RgtD(RL0684)      379 IVTDNRDMVADLFYTLRDSYRIYARAPAGLPESYQEYEFALPADITGKVLFLTDGAFTC

RgtA(RL1469)      447 TAADAVMPERFSSALTAAGIALQEIIGSLSLPYFGRQGNFALGYAWVRPETR
RgtB(RL1468)      443 GGSEALPDMAEWLQANLGTSAFEASVIDVPYFYGRGDDRYRFGYAWVNQPG-
RgtC(RL1471)      449 TADDPTISPGFANDLVKSGIHLPELKTTLTPYLFYLDGKRSFSGYSWVEGGAK
RgtD(RL0684)      439 ATE---TPEVLKNWQPTG-----NYKGTLSIYKVSATCLAP---

```

| <u>Strains</u>                 | <u>Related Enzymes</u> | <u>Reaction</u>                                       |
|--------------------------------|------------------------|-------------------------------------------------------|
| <i>Rhizobium leguminosarum</i> | RgtE, 100% i.d.        | UDP-D-GalA $\longrightarrow$ Dod-P-GalA               |
| <i>Escherichia coli</i>        | ArnC, 32% i.d.         | UDP-L-AraNFormyl $\longrightarrow$ Und-P-L-AraNFormyl |
| <i>Francisella novicida</i>    | FlmF1, 24% i.d.        | UDP-D-GalNAc $\longrightarrow$ Und-P-D-GalNAc         |
|                                | FlmF2, 23% i.d.        | UDP-D-Glc $\longrightarrow$ Und-P-D-Glc               |

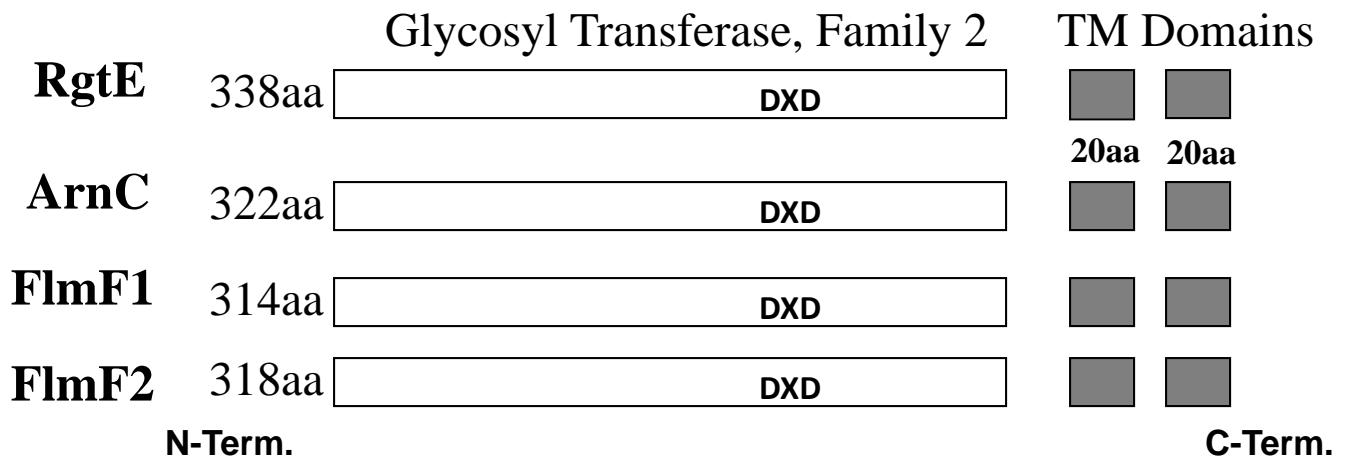

Summary of Percent Matches:

|      |                     |      |     |   |         |     |
|------|---------------------|------|-----|---|---------|-----|
| Ref: | R1 RgtD(RL0684)     | 1 to | 473 | ( | 473 aa) | --  |
|      | 2: Aq RgtD(aq_765)  | 1 to | 480 | ( | 480 aa) | 27% |
|      | 3: Cc RgtD(CC_0209) | 1 to | 524 | ( | 524 aa) | 29% |

```

R1 RgtD(RL0684)      1 -----MSP-----RSGLLIVLG--FTLWRVVMINFDATDFVDEAQYWFWSQNLDL
Aq RgtD(aq_765)     1 -----MFGLLALLINTFFLVFRVLYVLFYPVDLSPEEAQYWDWSRHLDL
Cc RgtD(CC_0209)    1 MQTAPDASSPPIENRAWRLTLLMIGG--LTIVRLAALFLTPLELYPDEAQYWLSRELAF

R1 RgtD(RL0684)     45 GYYSKPPMIAWVIRAMTELSGSNAIYWIRLLGPLIHMAALVLMKTAKRFGVPEIEGWTG
Aq RgtD(aq_765)     44 SYYSKPPMVAYMNFSLSTHVFG-NTELGVRIINAILLSFLLSLITYFFAKKLFSEKVAFVAS
Cc RgtD(CC_0209)    59 GYFSKPPMIAWLIWATTQIGDTEA--WVRLSAPFLHGATALVIHRIARRLYG----GWAG

R1 RgtD(RL0684)     105 ----ATYITLPGVALSSVFFSTDVILLFFIAIALLAYFGL---TQRRSVGLALVMGLGVG
Aq RgtD(aq_765)     103 ----VVPNLFTGFSINSVLFSTDSPLIFFWALSVISFYFA---IEKNTLSLWILTGVFSG
Cc RgtD(CC_0209)    113 LAAAAIYSLMPGVVLSGLIATDAPLLFFLSLTVWAYVSLPDASARRRYALAAGMGAALG

R1 RgtD(RL0684)     158 LAFLTKYAVLEVVPGGAIALLIIPAAFIIVRDVIIAVAVAA--VVALPNLWNNLQHDNTT
Aq RgtD(aq_765)     156 LAFLSKYPAVELLPLGILYLYLTKKELLKDLKIFSSVLVAF--LIALPVLINWNAKHDFIS
Cc RgtD(CC_0209)    173 LAFLSKYAAVYALGSVALHFAISSEARRRWSPALVGLFIVAFALVLPNLLWNAANQFST

R1 RgtD(RL0684)     216 VRHTQDIAHWSELGI-NLRGLEFFAAQFGVVGPIIFFAMLW-AVYRMIRGRSDDREKML
Aq RgtD(aq_765)     214 FKHVSNLAQKHAHFP-NFSTFFEYLGGQVLLLSVLPFFVFLY-GWVRFVK----ERNKRL
Cc RgtD(CC_0209)    233 VKHTAANANWNAHQLFNVRELIEFVGSQFGVFGPVPFAVLIGGAIWLGVKRKLQSPDLLL

R1 RgtD(RL0684)     274 VWL---SMPVLLITLQATVAKAYANWAVTAYVAGTIL-AVWLLYLKWPKGLR-LSLTIN
Aq RgtD(aq_765)     268 IFLTTFSLPVFLFFAFSLKRVYANWAGFGYITASIL-FAY-YFLKSPKSIKFLTLILS
Cc RgtD(CC_0209)    293 LCF---ALPPLIVVAGEAFVSRANANWAGAAFVSGSVIVAGWLLRWNARRWLI-GGLVLQ

R1 RgtD(RL0684)     329 GIASLLFPLATIFPH----QLLLPNGDALMKRYLG-----RAEVSREAAALATQAGTDII
Aq RgtD(aq_765)     326 AFLTLLHFTPLFDYLGRLNLLPPKRDPA-KLLVG-----WEDLGKEVGRFYT--GKELI
Cc RgtD(CC_0209)    349 AAFAAFAFVACMVNPKVAD-AAGLSNG---FKRVRGWDQTVAVIARVREEQALRGPLSAV

R1 RgtD(RL0684)     380 VTDNRDMVADL-FYTLRDASYRIYARAPA-----GLPESYYEQEFALPADITGK-VLF
Aq RgtD(aq_765)     378 FSTAYQISAELAFYV--PGNPRTYVFHVN-----RYTQYYLWREGL--KNFKGKDAVF
Cc RgtD(CC_0209)    405 AMDDREFYNA--AYYGRD--YFGQPGAPPLRMWVHEAYPQNQAETETPLDADYGRR-ALI

R1 RgtD(RL0684)     431 LT-DGAFTCAT---ETPEVLKNWQPTEG-----NYKGTLSIYKVS----A----
Aq RgtD(aq_765)     427 VS-YGGVPKEVMRSFEGKEFLKEVRVWWR-----NQVVRKFYIYKLNFKGE----
Cc RgtD(CC_0209)    461 VSLEGGY-----RPEIEQDFKAVSGLQIARVRLDKTRSRRVDLFAE----GFAPL

R1 RgtD(RL0684)     469 -----TCLAF-----
Aq RgtD(aq_765)     473 -----FYENPKGY----
Cc RgtD(CC_0209)    508 PRDPITGLPPKPKTAAR
    
```

Supp3
